# Supplementary material for: The de novo and salvage pathways of GDP-mannose biosynthesis are both sufficient for the growth of bloodstream-form Trypanosoma brucei
Source: PubMed Central journal article supplement (PMC3412276; doi:10.1111/j.1365-2958.2012.08026.x), 2012-04
Supplement: mmi0084-0340-SD1.pdf [file mmi0084-0340-SD1.pdf]

1  
2  
3  
4  
5  
6  
7  
8  
9  
10  
11  
12  
13  
14  
15  
16

**Supporting Information to**  
**The *de novo* and salvage pathways of GDP-mannose**  
**biosynthesis are both sufficient for the growth of**  
**bloodstream form *Trypanosoma brucei***

Sabine Kuettel, Majken C.T. Wadum, Maria Lucia S. Güther,  
Karina Mariño<sup>1</sup>, Carolin Riemer<sup>2</sup>, Michael A. J. Ferguson\*

Division of Biological Chemistry and Drug Discovery, School of Life Sciences,  
University of Dundee, Dundee DD1 5EH, Scotland, United Kingdom

\*Corresponding author. Mailing address: Division of Biological Chemistry and Drug  
Discovery, School of Life Sciences, University of Dundee, Dundee DD1 5EH, Scotland,  
United Kingdom. Phone: 44 1382 384219. Fax: 44 1382 348896. E-mail:  
m.a.j.ferguson@dundee.ac.uk

16 **Supplementary figures:**

17 **Figure legends**

18

19 **Fig. S1.** Sequence alignment of PMI shows the conserved amino acids between the  
20 different organisms. The *pmi* sequence of *Trypanosoma brucei* is compared with other  
21 protozoans *Trypanosoma cruzi* and *Leishmania donovani*, with yeasts (*Saccharomyces*  
22 *cerevisiae* and *Candida albicans*) and with mammals (*Homo sapiens*).

23

24 **Fig. S2.** RT-PCR. *TbPMI* is transcribed in both the procyclic and bloodstream form life  
25 cycle stages of the *T.brucei*. The RT-PCR was performed using *TbPMI* primers, DPMS  
26 (Dolichyl-phosphate-mannose synthetase) primers as a positive control and DPMS  
27 primers without reverse transcriptase as a negative control.

28 (A) RT-PCR product of procyclic RNA, used in different amounts. (B) RT-PCR product  
29 of bloodstream RNA, used in different amounts. (1) Procyclic negative control. (2)  
30 Procyclic positive control. (3) Bloodstream negative control. (4) Bloodstream positive  
31 control.

32

33 **Fig. S3.** The optimum pH for *TbPMI* activity was determined by performing reactions  
34 over a range of pH values from pH 5.0 to pH 10. The reactions were performed in  
35 triplicate for each pH value. *TbPMI* was found to have a pH optimum between pH 7.3  
36 and 8.5.

37

38

39 **Fig. S4.** Gas chromatography-mass spectrometry (GC-MS). Monosaccharides released  
40 from VSG-glycoconjugates by acid hydrolysis (4 M TFA, 100°C, 4 hours) were TMS-  
41 derivatized and then analyzed by GC-MS. The ions 204 and 206 corresponding to <sup>12</sup>C-  
42 and <sup>13</sup>C-hexoses, respectively, were extracted from the GC-MS total ion chromatogram of  
43 acid hydrolyzed, TMS-derivatized (A) mannose and galactose standards (1 nmol each) or  
44 VSG (10 µg) isolated from wild type *T.brucei* bloodstream cells grown in (B) 5 mM <sup>13</sup>C-  
45 glucose, (C) 5 mM <sup>13</sup>C-glucose and 55 µM <sup>12</sup>C-mannose, or (D) 5 mM <sup>13</sup>C-glucose and  
46 1.5 mM <sup>12</sup>C-mannose.

47

48

48 **Fig. S1:**

49

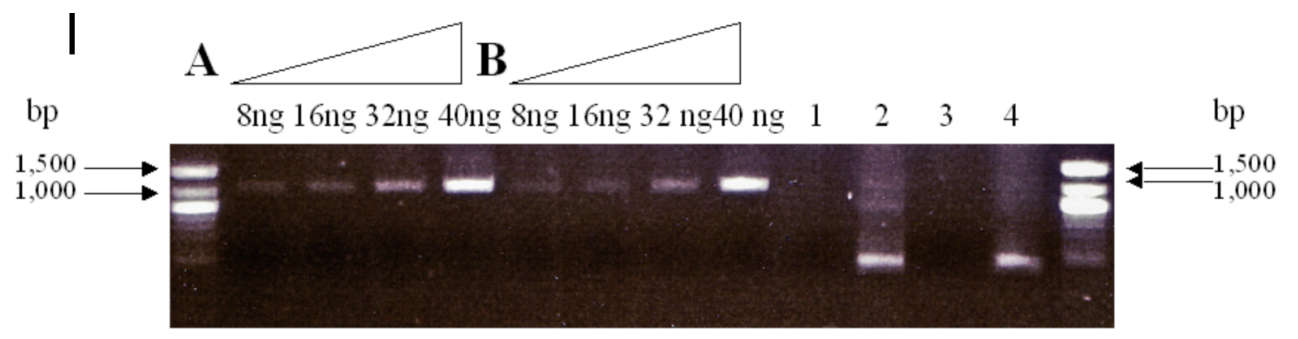

50

51

51 **Fig. S2:**

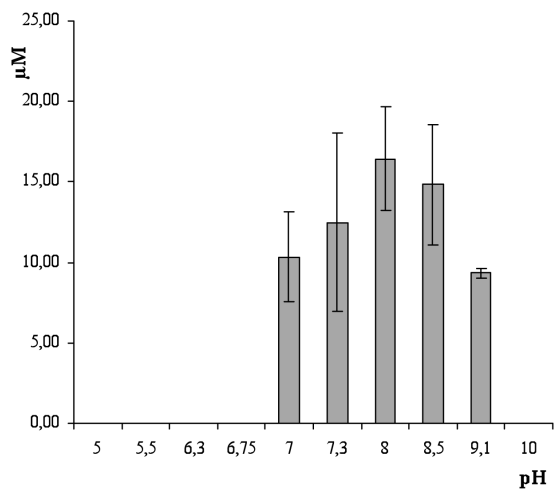

52

53

53 Fig. S3:

|              |     |                                                                                                                                 |     |
|--------------|-----|---------------------------------------------------------------------------------------------------------------------------------|-----|
| T.brucei     | 1   | --MSKELIKLDCGVQHYANGKEAAEYVAKMKGEGNKE-----GKYAELWGWTHMPCSKTFSG--QNLDDFLKNDNMMSRFVHPKQADPRFRDTPVFLKLLSVQTALSIOAHPNK109           |     |
| T.cruzi      | 1   | --MVGKLVKLDGCVQHYDNGKVPAESFVAKMKHETBGT-----RKYAEWGWTHMPCSKRLLSG--QLLGEYLRDPGIANSFFSPEHQSNVELRNNVPFLKLVSVQTALSIOAHPNKK109        |     |
| L.donovani   | 1   | --MSELVKLEVBHDIYANGKDAASSFVAKMKGLTNDKS---GKMFRELWGWTHMPCSRDIADGDAQLLEEFLKOPENKMKKYVFEAHOATT--FRDTPVYLLKILSIRITALSIOAHPCKK112    |     |
| C.albicans   | 1   | MSSEKLFRIQCGYQNDYDNGKIGSSSAVAQFVHNSDPSITIDEKPYAELWGWTHMPCSKAIDLNN--QTLRDLVTAKPOEYLGESIIITKFGSSKELPFLFKVLSIEKVLVLSIOAHPDKK117    |     |
| S.cerevisiae | 1   | MSN-KLFRIDAGYQYDNGKIGSSSAVAQFAAHSDPVQIQEQDKPYAELWGWTHMPCSKMPSYNHESK---ESLRDIISKNPASMLGKDIIDKFHATNELPFLFKVLSIEKVLVLSIOAHPDKA115  |     |
| H.sapiens    | 1   | MAAPRVFPLSGAVQQYANGKMGNSSEVARLLASSDPLAQIAEDKPYAELWGWTHMPCSKAIDLNNRISOKTLSOWIAEN-QDSLGSVKYDFTNGN--LPFLFKVLSVETPLSIOAHPNKE116     |     |
| T.brucei     | 110 | LAEKLRHREPEKYKDPNHHKPELVVALTPFEALCCFRPLKDI LEFL ESASP LKTL LGPAADV-----LPGEVEDSEAIKHMDIIVYNTDAKKHAEIQEHAEELRSRGGEMT215          |     |
| T.cruzi      | 110 | LAEKLRHRENSKYKDPNHHKPELIVALTPFEALCCFRPLQEI LSLVSTKPLKTL LGNIAVV-----SANES-DGDLIEGMMRVLYSLNPEVHTKALREHAAAVSAKGEAAS214            |     |
| L.donovani   | 113 | LAEKLHAARPDKYKDPNHHKPELICALTPFEALCCFRPLGAI IAYLKRIPELAEVLGADAVLGQYM-MAPESALPATDSDEEKQSLKAMITNYVAAASDDIVTKALRHLQRIEETG-AQC229    |     |
| C.albicans   | 118 | LGAQLHAADPKNYDDNHHKPEMAIAVTD FEGFCGFKPLDQAKTLATVPELNEIIGOE LVDEFISGIKLPAEVGSODDVNNRKL LQKVFGLMNTDDVIVKQATAKLLERTDREPQVFK236     |     |
| S.cerevisiae | 116 | LGIKILHAQDPKNYPDDNHHKPEMAIAVTD FEGFCGFKPLQEI LAELKRIPELRNIIVGEE TSRNF IENIQPSAQKGSPEDEQNKLLQAVSRVMNASDDKIKIQARS LVERSKNPSDFN234 |     |
| H.sapiens    | 117 | LAEKLHLQAPQHYPDANHHKPEMAIALTPFQGLCGFRVVEIIVTF LKKVPEFQFLIGDEATHLKTQMSHDSQAVSS-----LQSCFSHLMKSEKVVVEQLNLLVKRISQAAAAGN228         |     |
| T.brucei     | 216 | KED---SVFLRVLYQYDDDMGQWM-VYFLNYVQLAPGEGFLADSEPHAYLFGDSVEIMACSDNVVRAGLTPKWKDVPTLLRMLRYGTDGLERAKFERYRAPEGSEWELQHYSPREF329         |     |
| T.cruzi      | 215 | TED---RFLRLMSQYRDDIGQWM-LYFLNYVQMPGQGLFLSDSEPHAYLFGDVEIMANSNDNVVRAGLTPKWKDVPTLLEMLHYNTGLERAKFERYRAAEAGEAWEVQYRSPRPF328          |     |
| L.donovani   | 230 | AED---ELFVRIYROYPPDDVGGWM-VYFLNYVQMPGQGLFLSDSEPHAYIIGDVEIMACSDNVVRAGLTPKWKDVPTLISMLKYDTGLASARHEKKSSEDAQWQVQYRPPAQF343           |     |
| C.albicans   | 237 | DISRLPEL IORLNKGFNDI GLFCGCLLNHVGLNKGEMFLQAKDPHAYISDIIIECMAASDNVVRAGFTPKFKDVKNLVEMLTYSYSEVQKQMPLOEFPRSSKGDVAVKSVLYDPP1355       |     |
| S.cerevisiae | 235 | KPD--LPEL IORLNKGFDDVGLFCGCLLNHCRLNAGEAIFLRAKDPHAYISDIMECMAASDNVVRAGFTPKFKDVKNLVSMLTYTDPVEKQKMQPLKFDRSSGNG-KSVLYNPP1350         |     |
| H.sapiens    | 229 | NMEDI FGE LLLQLHOGYFGDIGGFA-IYFLNLLTLKPGEMFL EANVPHAYLKGDCVECMACSDNTVRAGLTPKFI DVP T LCEMLSYTPSSSKDRLFLP---TRSQEDP-YLSIYDPPV342 |     |
| T.brucei     | 330 | QDFSLYRIEHRVER-OGQTHIKLPTVGLGFCVECCGIVNGERVRLGECFLVPYGD LKIEAFG-DFOIFVASMNYSLHSASHM-----                                        | 409 |
| T.cruzi      | 329 | TEFSLYRLEHVAQK-ASETCVNLPI NLGLGFC LGEGVVNGTHVAEGDCFAVPHGLKCESNG-RCVLVFASTNDGLPEOAHI-----                                        | 408 |
| L.donovani   | 344 | PDFSLYRMOYEHASGKGTTSVTPTI GLGFCLESAKVNQTTVNAQDCFAVPYGVYTCOAE GAKALVFASTND-LSDR-----                                             | 421 |
| C.albicans   | 356 | AEFSVLQTI FDKSKGKQVIEELNGPSIVIAITNGKGTIOITGDDSTKQKIDTGYVFFVAPGSSIELTADSDNODDFTTYRAFVEA-                                         | 441 |
| S.cerevisiae | 351 | EEFVLETTTFDEKLG-QRHFEQVDPGSI LIITTKNGYIKADGQ---KLLAEFGVFFIAP---HLVPDLEAEDEAF TTYRAFVEPN                                         | 429 |
| H.sapiens    | 343 | PDFTIMKTEVPGSVT-EYKVLAD SASILLMVGQ-TVIASPTTQTPIPLQRGGVLFIGANESVSLKLT---EPKDLLIFRACCLL-                                          | 423 |

54

55

56

56 Fig. S4:

57

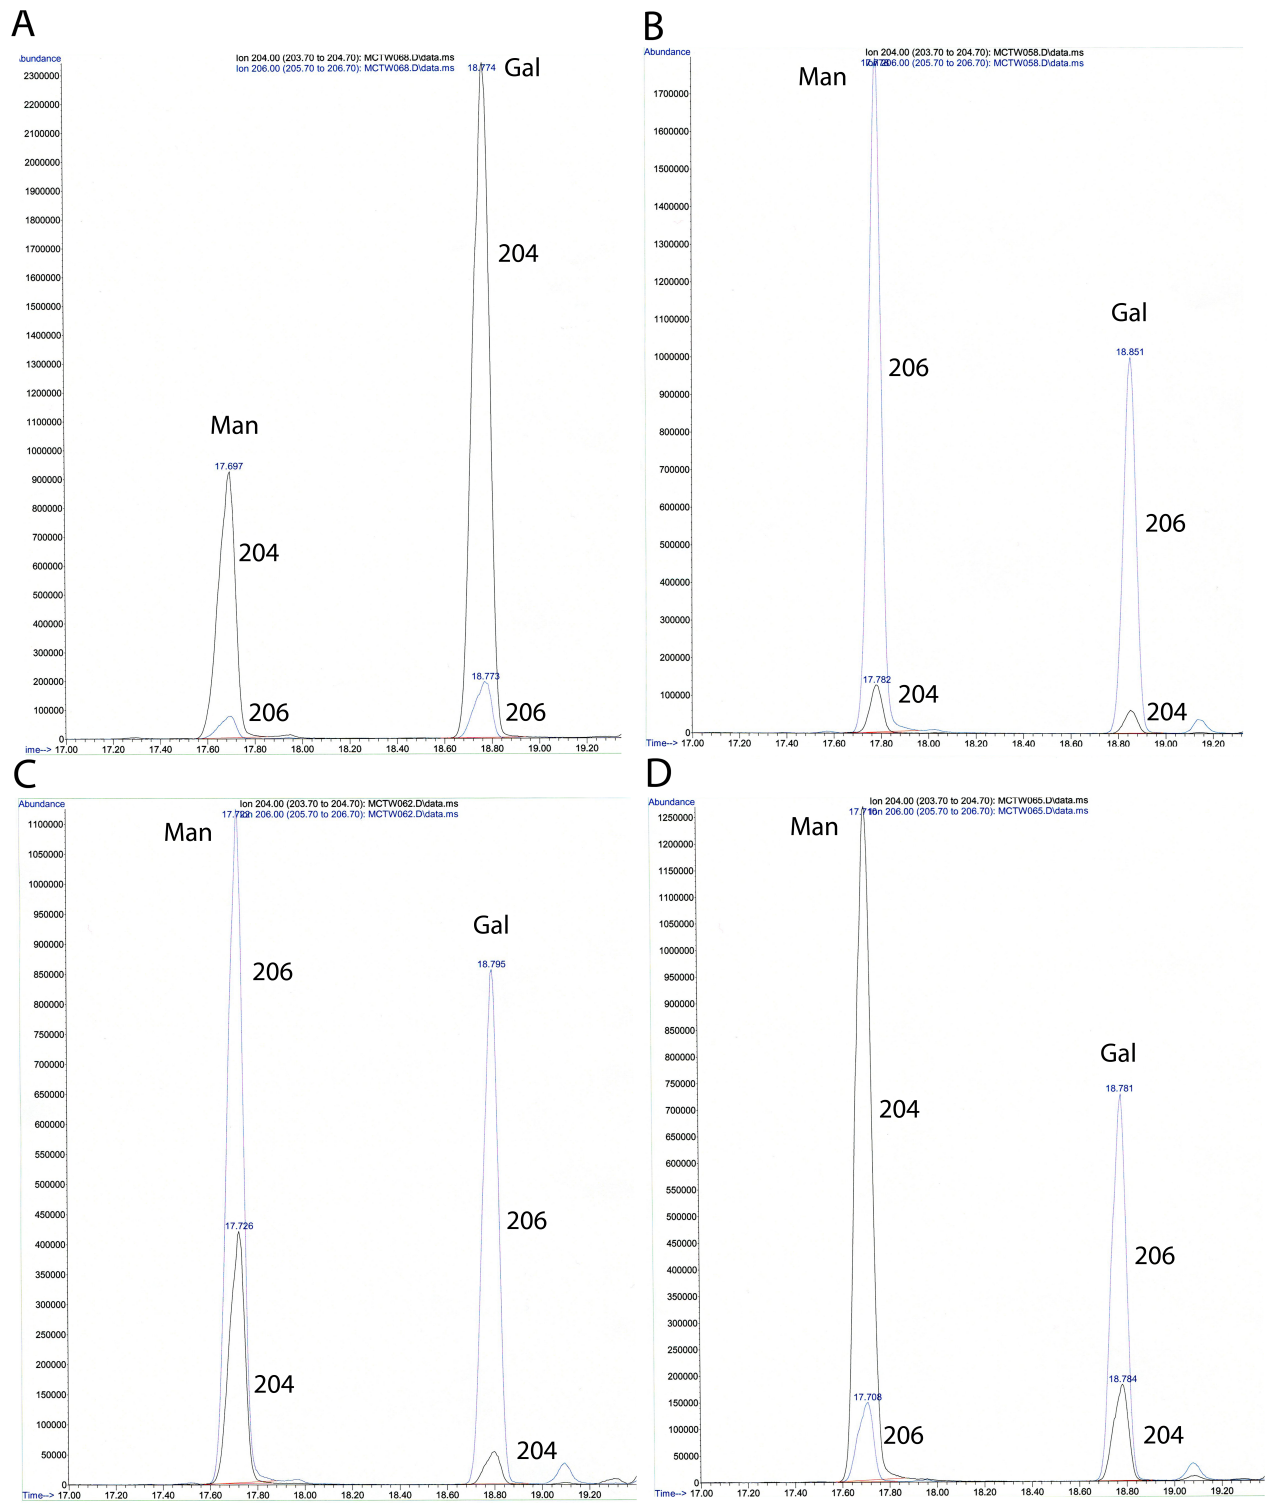

58
